# Supplementary material for: Intracellular Ca2+ is important for flagellin-triggered defense in Arabidopsis and involves inositol polyphosphate signaling
Source: PubMed Central journal article supplement (PMC5853439; doi:10.1093/jxb/erx176), 2017-06-08
Supplement: erx176_suppl_supplementary_figures_s1-s2.pdf [file erx176_suppl_supplementary_figures_s1-s2.pdf]

Fig. S1

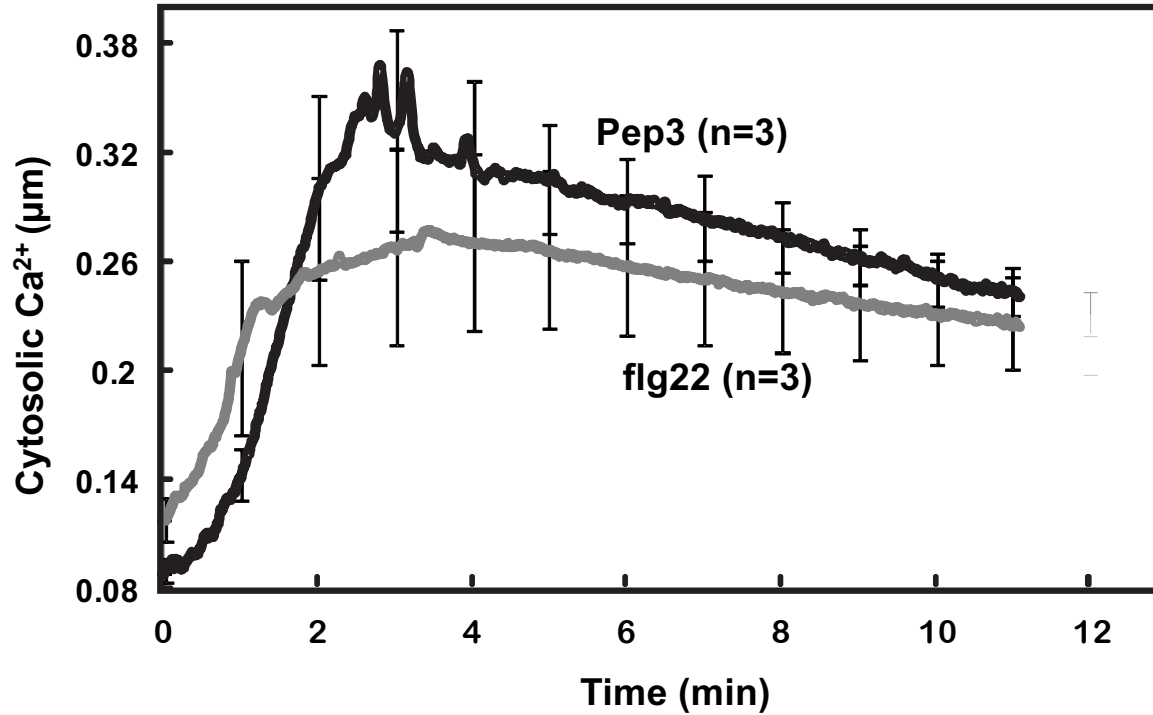

Fig. S1. Flg22- and Pep3-dependent cytosolic Ca<sup>2+</sup> elevation in wt (Col-aeq) seedlings. Ligand (20 nM flg22 or Pep3) was added at time '0'. Results are presented as means ( $\pm$  SE, n=3) calculated at 1 min intervals.

**Fig. S2**

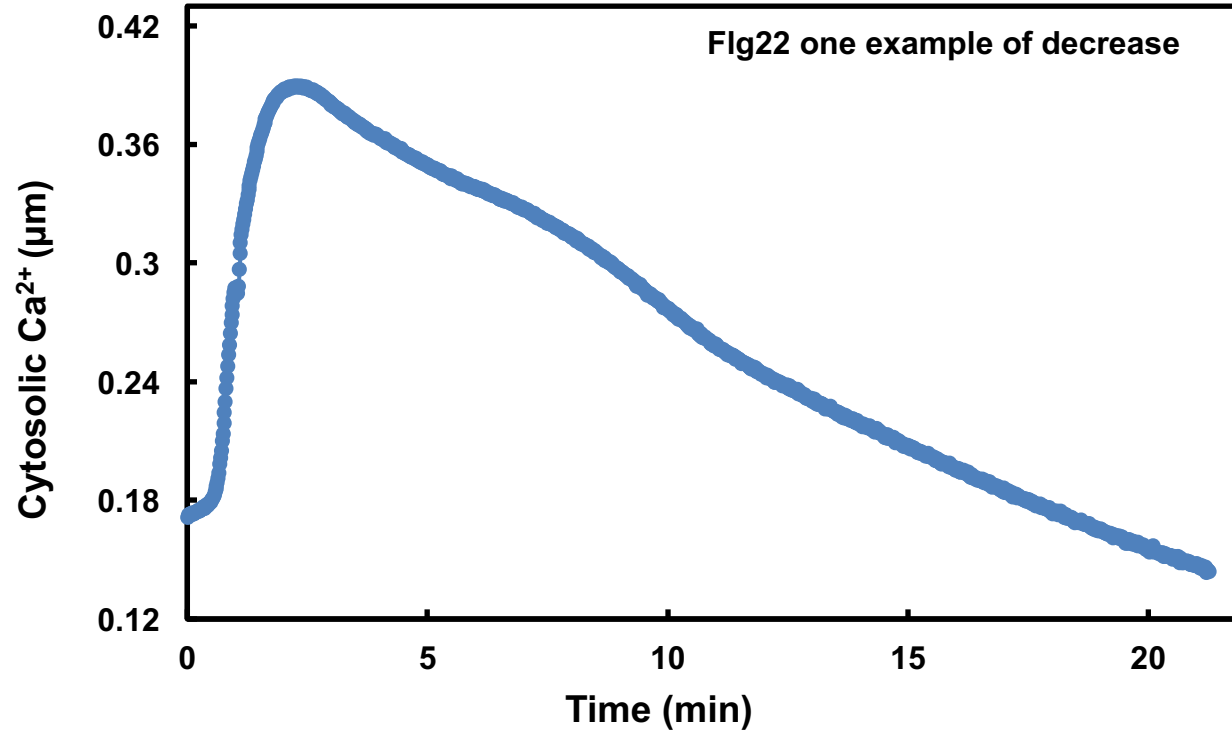

Fig. S2. The flg22-dependent cytosolic Ca<sup>2+</sup> elevation is transitory. A recording from an individual wt (Col-aeq) seedling exposed to (1 µM) flg22 at time ‘0’ is shown for a 22 min period after ligand addition. This recording is representative of those used for the compiled measurements shown in Fig. 3.
